# Supplementary material
Source: PubMed Central journal article supplement (PMC3083212)
Supplement: supp_M111.220996_jbc.M111.220996-1.pdf [file supp_M111.220996_jbc.M111.220996-1.pdf]

## Supplemental Data

### Crystallographic, kinetic, and spectroscopic study of the first ligninolytic peroxidase presenting a catalytic tyrosine\*

Yuta Miki<sup>‡</sup>, Fabiola R. Calviño<sup>‡</sup>, Rebecca Pogni<sup>§</sup>, Stefania Giansanti<sup>§</sup>, Francisco J. Ruiz-Dueñas<sup>‡</sup>, María Jesús Martínez<sup>‡</sup>, Riccardo Basosi<sup>§</sup>, Antonio Romero<sup>‡</sup> and Angel T. Martínez<sup>‡</sup>

From the <sup>‡</sup>*Centro de Investigaciones Biológicas, CSIC, Ramiro de Maeztu 9, E-28040 Madrid, Spain* and the <sup>§</sup>*Department of Chemistry, University of Siena, I-53100 Siena, Italy*

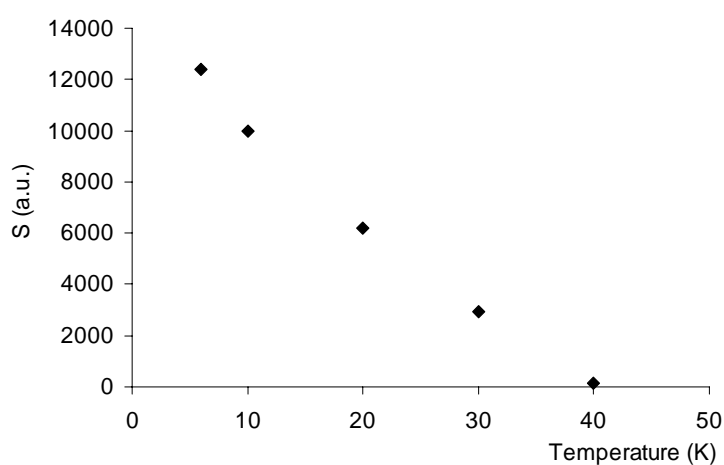

**S.D. FIGURE S1. Temperature effect on the EPR signal intensity of Y181N Compound I.** Spectra were recorded under the following conditions:  $\nu$ , 9.4 GHz; modulation amplitude, 0.4 mT; microwave power, 1 milliwatts; modulation frequency, 100 kHz; and temperature, 4, 10, 20, 30, 40 K.
